# Supplementary material for: Dodecanuclear [MnIII6LnIII6] species: synthesis, structures and characterization of magnetic relaxation phenomena
Source: Royal Society of Chemistry journal article supplement (doi:10.1039/c5dt01695a), 2015-01-01
Supplement: c5dt01695a1.pdf [file c5dt01695a1.pdf]

## ELECTRONIC SUPPLEMENTARY INFORMATION

to

### **Dodecanuclear [Mn<sup>III</sup><sub>6</sub>Ln<sup>III</sup><sub>6</sub>] species: Synthesis, structure and characterization of magnetic relaxation phenomena †**

Thomas G. Tziotzi,<sup>a</sup> Demetrios I. Tzimopoulos,<sup>b</sup> Tadeusz Lis,<sup>c</sup> Ross Inglis\*,<sup>d</sup> and Constantinos J. Milios\*,<sup>a</sup>

<sup>a</sup> Department Of Chemistry, University of Crete, Voutes 71003, Herakleion, Greece.  
Fax: +30-2810-545001; Tel: +30-2810-545099; E-mail: [komil@chemistry.uoc.gr](mailto:komil@chemistry.uoc.gr).

<sup>b</sup> Department of Chemistry, Aristotle University of Thessaloniki, 54124, Thessaloniki, Greece.

<sup>c</sup> Faculty of Chemistry, University of Wroclaw, Joliot-Curie 14, Wroclaw 50-383, Poland.

<sup>d</sup> School of Chemistry, The University of Edinburgh, David Brewster Road, EH9 3FJ, Edinburgh, UK. Email: [ringlis@staffmail.ed.ac.uk](mailto:ringlis@staffmail.ed.ac.uk)

## SYNTHETIC DETAILS

All manipulations were performed under aerobic conditions using materials (reagent grade) and solvents as received.

*General synthetic strategy applicable to 1-2:*

Mn(O<sub>2</sub>CPh)<sub>2</sub>·2H<sub>2</sub>O (120.33 mg, 0.33 mmol), Ln(NO<sub>3</sub>)<sub>3</sub>·6H<sub>2</sub>O (0.33 mmol), H<sub>3</sub>L (86 mg, 0.33 mmol) and NEt<sub>3</sub> (~ 1 mmol) were dissolved in MeCN (20 mL) forming a yellow suspension that was left upon stirring for ~35' to yield a dark brown solution. The solution was then filtered and left undisturbed to evaporate slowly at room temperature. Dark-brown single-crystals suitable for X-ray crystallography were formed after ~ 3 days in 30-35% yields, and they were washed with Et<sub>2</sub>O and dried in air.

Elemental Anal. calcd (found) for 1·4MeCN·H<sub>2</sub>O: C 45.54 (45.63), H 3.12 (2.98), N 2.33 (2.17); 2·3MeCN·H<sub>2</sub>O: C 45.63 (45.74), H 3.14 (2.99), N 2.34 (2.22) %.

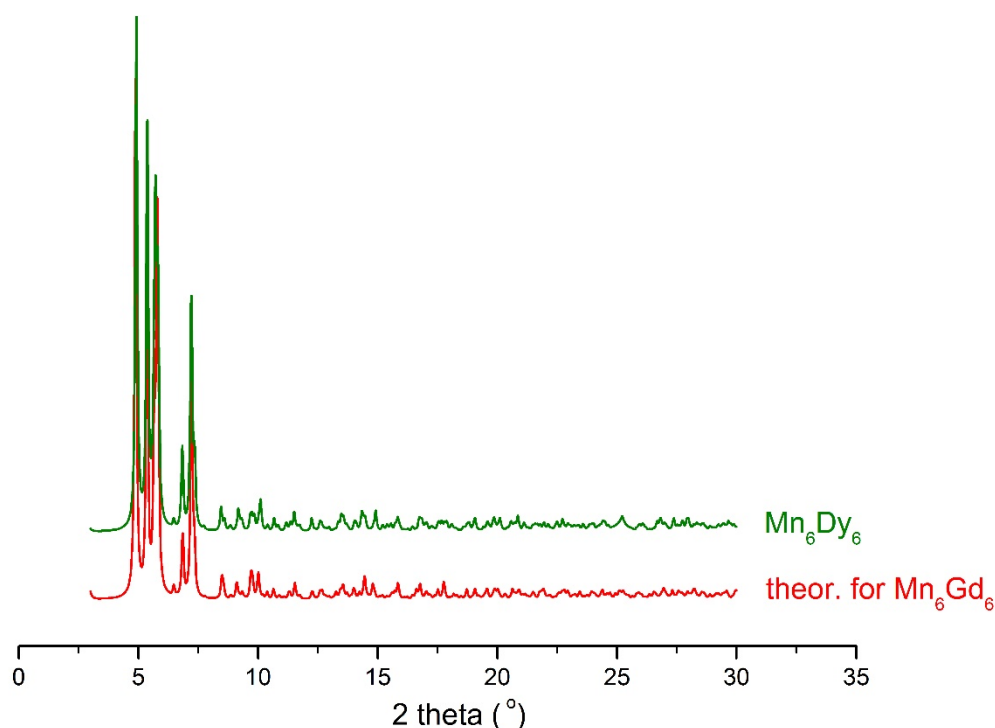

**Fig. S1** Experimental PXR D pattern for the Dy analogue (top) compared with the theoretical PXR D pattern of the Gd analogue (bottom).

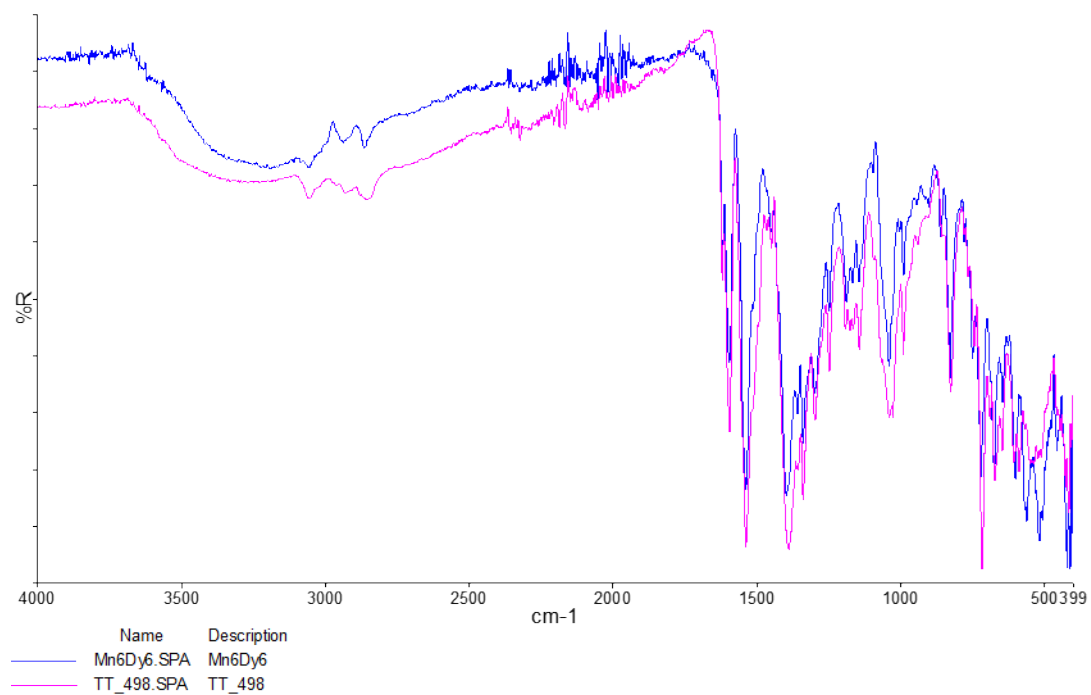

**Fig. S2** IR spectra comparison for the Dy (blue line) and Gd (red line) analogues

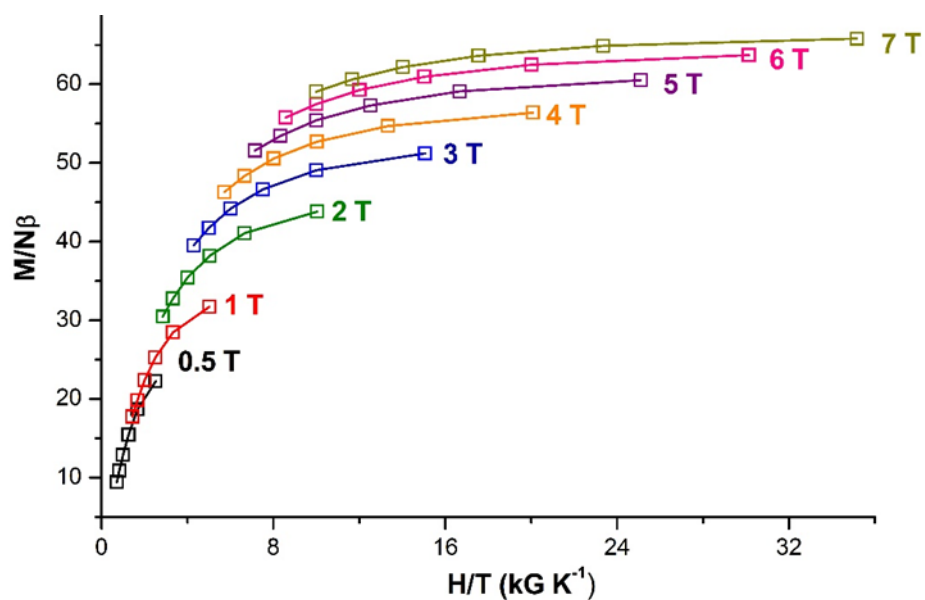

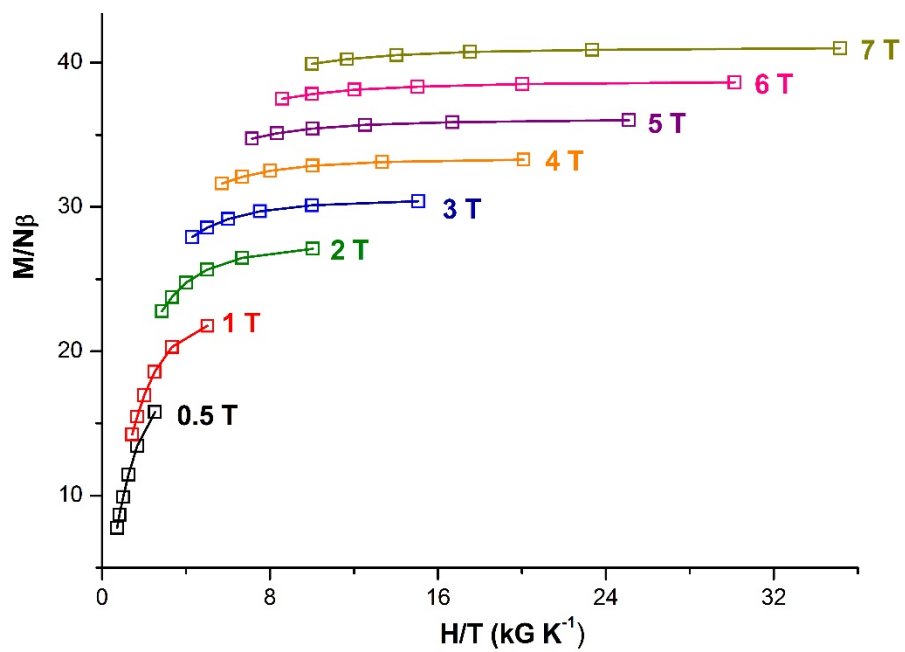

**Fig. S3** Reduced magnetization plots for compounds **1**(top) and **2** (bottom) at the indicated fields. The solid lines are guides for the eye.
